# Supplementary material for: SHP2 phosphatase as a novel therapeutic target for melanoma treatment
Source: PubMed Central journal article supplement (PMC5342016; doi:10.18632/oncotarget.12074), 2016-09-16
Supplement: oncotarget-07-73817-s001.pdf [file oncotarget-07-73817-s001.pdf]

# SHP2 phosphatase as a novel therapeutic target for melanoma treatment

## SUPPLEMENTARY FIGURES

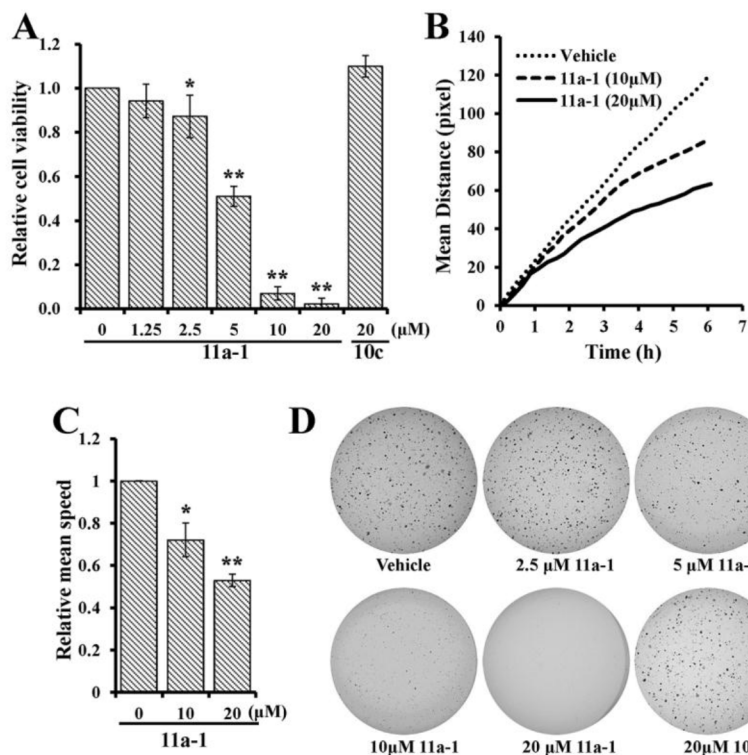

Supplementary Figure S1: SHP2 inhibitor 11a-1 inhibits A. cell viability B. mean moving distance C. mean moving speed and D. anchorage-independent growth in mouse melanoma B16F10 cells.

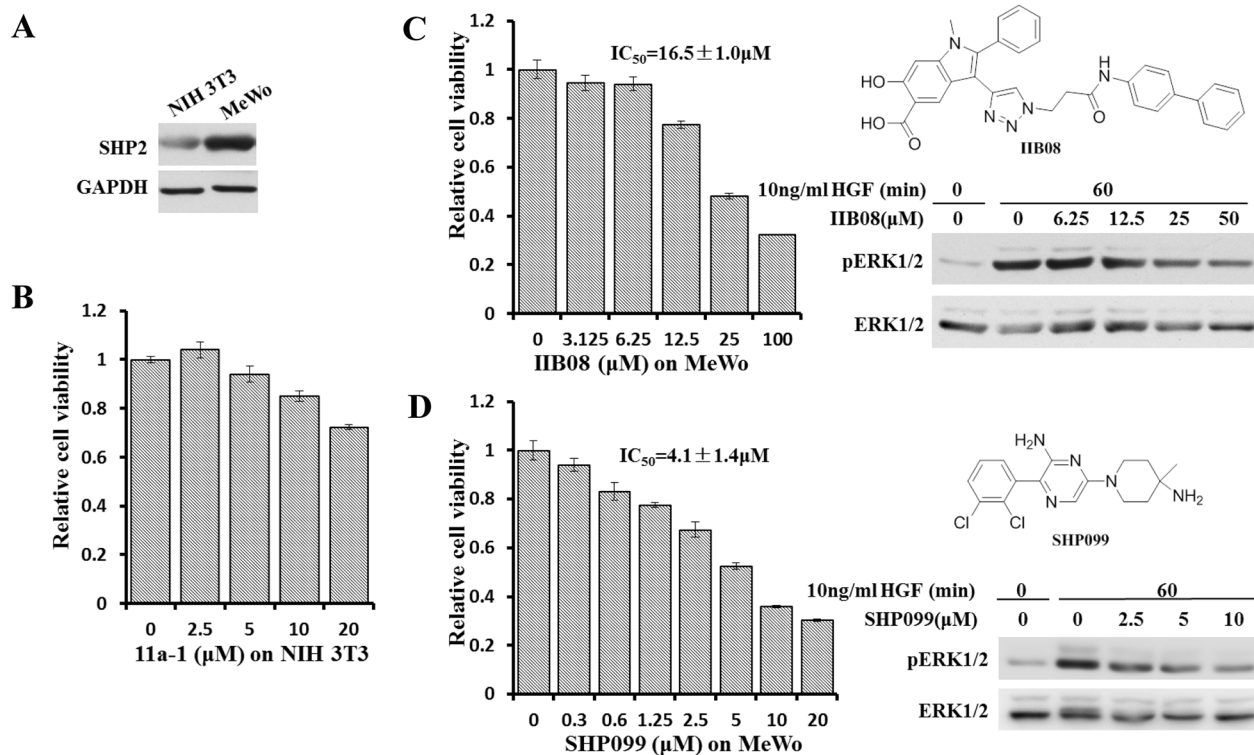

Supplementary Figure S2: 11a-1 inhibits MeWo cell viability through targeting SHP2.

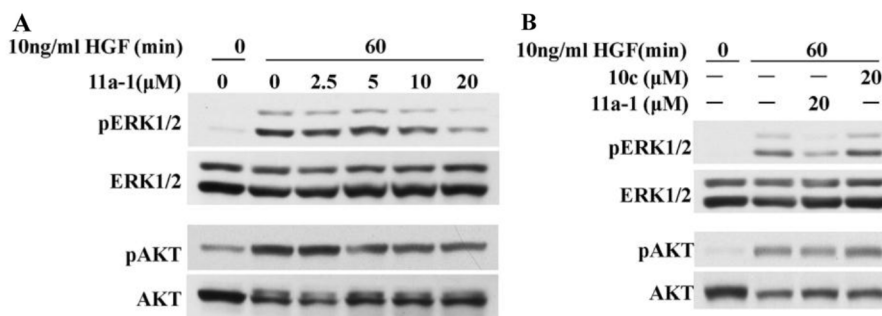

Supplementary Figure S3: A. SHP2 inhibitor 11a-1 inhibits HGF-induced REK1/2 and AKT activation in B16F10 mouse melanoma cell, but B. the negative control compound 10c doesn't show any inhibition on ERK1/2 or AKT activation in B16F10 cell line.

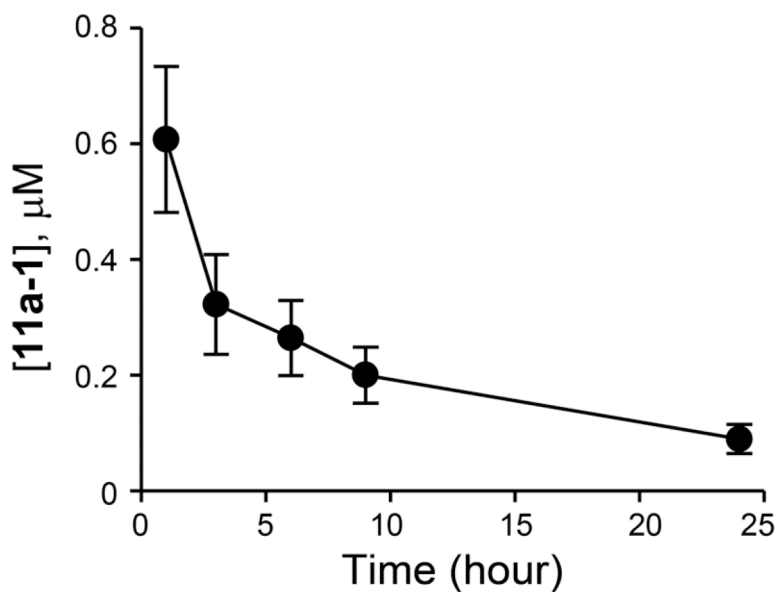

**Supplementary Figure S4: Pharmacokinetics of 11a-1.** Three mice were injected a single *IP* dose of 11a-1 at 10 mg/kg. At different time, blood samples were collected and analyzed by HPLC/mass spectrometry.

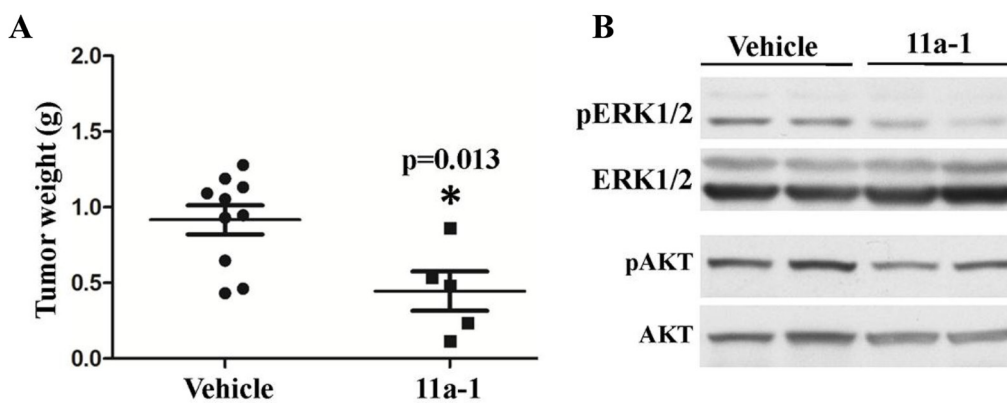

**Supplementary Figure S5: 11a-1 suppresses B16F10 melanoma cell xenograft tumor growth *in vivo*.** A. 11a-1 treatment significantly reduced tumor weight. B. 11a-1 treatment led to decreased ERK1/2 and AKT activation in B16F10 xenograft tumor samples.
